# Supplementary material for: Development of a 5-mRNAsi-related gene signature to predict the prognosis of colon adenocarcinoma
Source: PeerJ. 2023 Nov 24;11:e16477. doi: 10.7717/peerj.16477 (PMC10680455; doi:10.7717/peerj.16477)
Supplement: Supplemental Information 3 [file peerj-11-16477-s003.xlsx]

## Sheet: PCR
HEYL										HEYL				HEYL
NCM460			HCT116			SW480				NCM460	HCT116	SW480		NCM460	HCT116	SW480
24.54	25.61	1.07	24.42	22.06	-2.36	24.9	23.6	-1.3		0	-3.43	-2.37		1	10.7779	5.16941
24.06	25.22	1.16	24.08	23.6	-0.48	24.04	22.07	-1.97		0.09	-1.55	-3.04		0.939523	2.92817	8.22491
24.97	26.64	1.67	24.56	22.73	-1.83	24.58	22.65	-1.93		0.6	-2.9	-3		0.659754	7.46426	8
FSTL3										FSTL3				FSTL3
NCM460			HCT116			SW480				NCM460	HCT116	SW480		NCM460	HCT116	SW480
24.54	25.13	0.59	24.42	22.39	-2.03	24.9	22.3	-2.6		0	-2.62	-3.19		1	6.1475	9.12611
24.06	24.82	0.76	24.08	21.47	-2.61	24.04	22.12	-1.92		0.17	-3.2	-2.51		0.888843	9.18959	5.6962
24.97	24.92	-0.05	24.56	22.39	-2.17	24.58	21.62	-2.96		-0.64	-2.76	-3.55		1.55833	6.77396	11.7127
FABP4										FABP4				FABP4
NCM460			HCT116			SW480				NCM460	HCT116	SW480		NCM460	HCT116	SW480
24.54	26.53	1.99	24.42	23.42	-1	24.9	23.28	-1.62		1.9984e-15	-2.99	-3.61		1	7.94474	12.2101
24.06	26.04	1.98	24.08	22.96	-1.12	24.54	23.18	-1.36		-0.01	-3.11	-3.35		1.00696	8.63383	10.1965
24.97	25.55	0.58	24.56	23.35	-1.21	24.58	22.85	-1.73		-1.41	-3.2	-3.72		2.65737	9.18959	13.1775
ADAM8										ADAM8				ADAM8
NCM460			HCT116			SW480				NCM460	HCT116	SW480		NCM460	HCT116	SW480
24.54	25.03	0.49	24.42	21.82	-2.6	24.9	23.38	-1.52		1.9984e-15	-3.09	-2.01		1	8.51496	4.02782
24.06	24.85	0.79	24.08	22.62	-1.46	24.04	22.34	-1.7		0.3	-1.95	-2.19		0.812252	3.86375	4.56305
24.97	25.49	0.52	24.56	22.08	-2.48	24.58	22.82	-1.76		0.03	-2.97	-2.25		0.97942	7.83536	4.75683
EBF4										EBF4				EBF4
NCM460			HCT116			SW480				NCM460	HCT116	SW480		NCM460	HCT116	SW480
24.54	23.52	-1.02	24.42	21.66	-2.76	24.9	21.94	-2.96		0	-1.74	-1.94		1	3.34035	3.83706
24.06	23.86	-0.2	24.08	21.9	-2.18	24.04	21.49	-2.55		0.82	-1.16	-1.53		0.566442	2.23457	2.88786
24.97	23.64	-1.33	24.56	21.96	-2.6	24.58	21.59	-2.99		-0.31	-1.58	-1.97		1.23971	2.9897	3.91768

## Sheet: apoptosis
HCT116			SW480
si NC	si HEYL		si NC	si HEYL
1.01	12.22		0.82	10.75
0.68	11.81		1.14	9.95
0.53	17.07		0.291	12.24

## Sheet: CCK8
HCT116
	si NC			si HEYL
0	0.119	0.158	0.133	0.146	0.129	0.154
12	0.494	0.501	0.428	0.352	0.357	0.411
24	0.787	0.891	0.831	0.713	0.658	0.592
36	1.08	1.167	1.123	0.892	0.991	0.786
SW480
	si NC			si HEYL
0	0.144	0.132	0.123	0.141	0.174	0.138
12	0.489	0.532	0.472	0.363	0.392	0.465
24	0.849	0.951	0.948	0.771	0.799	0.623
36	1.083	1.165	1.018	0.828	0.933	0.904
